# Supplementary material for: Accumulation of citrullinated glial fibrillary acidic protein in a mouse model of bile duct ligation-induced hepatic fibrosis
Source: PubMed Central journal article supplement (PMC6072123; doi:10.1371/journal.pone.0201744), 2018-08-02

**Figure 4**

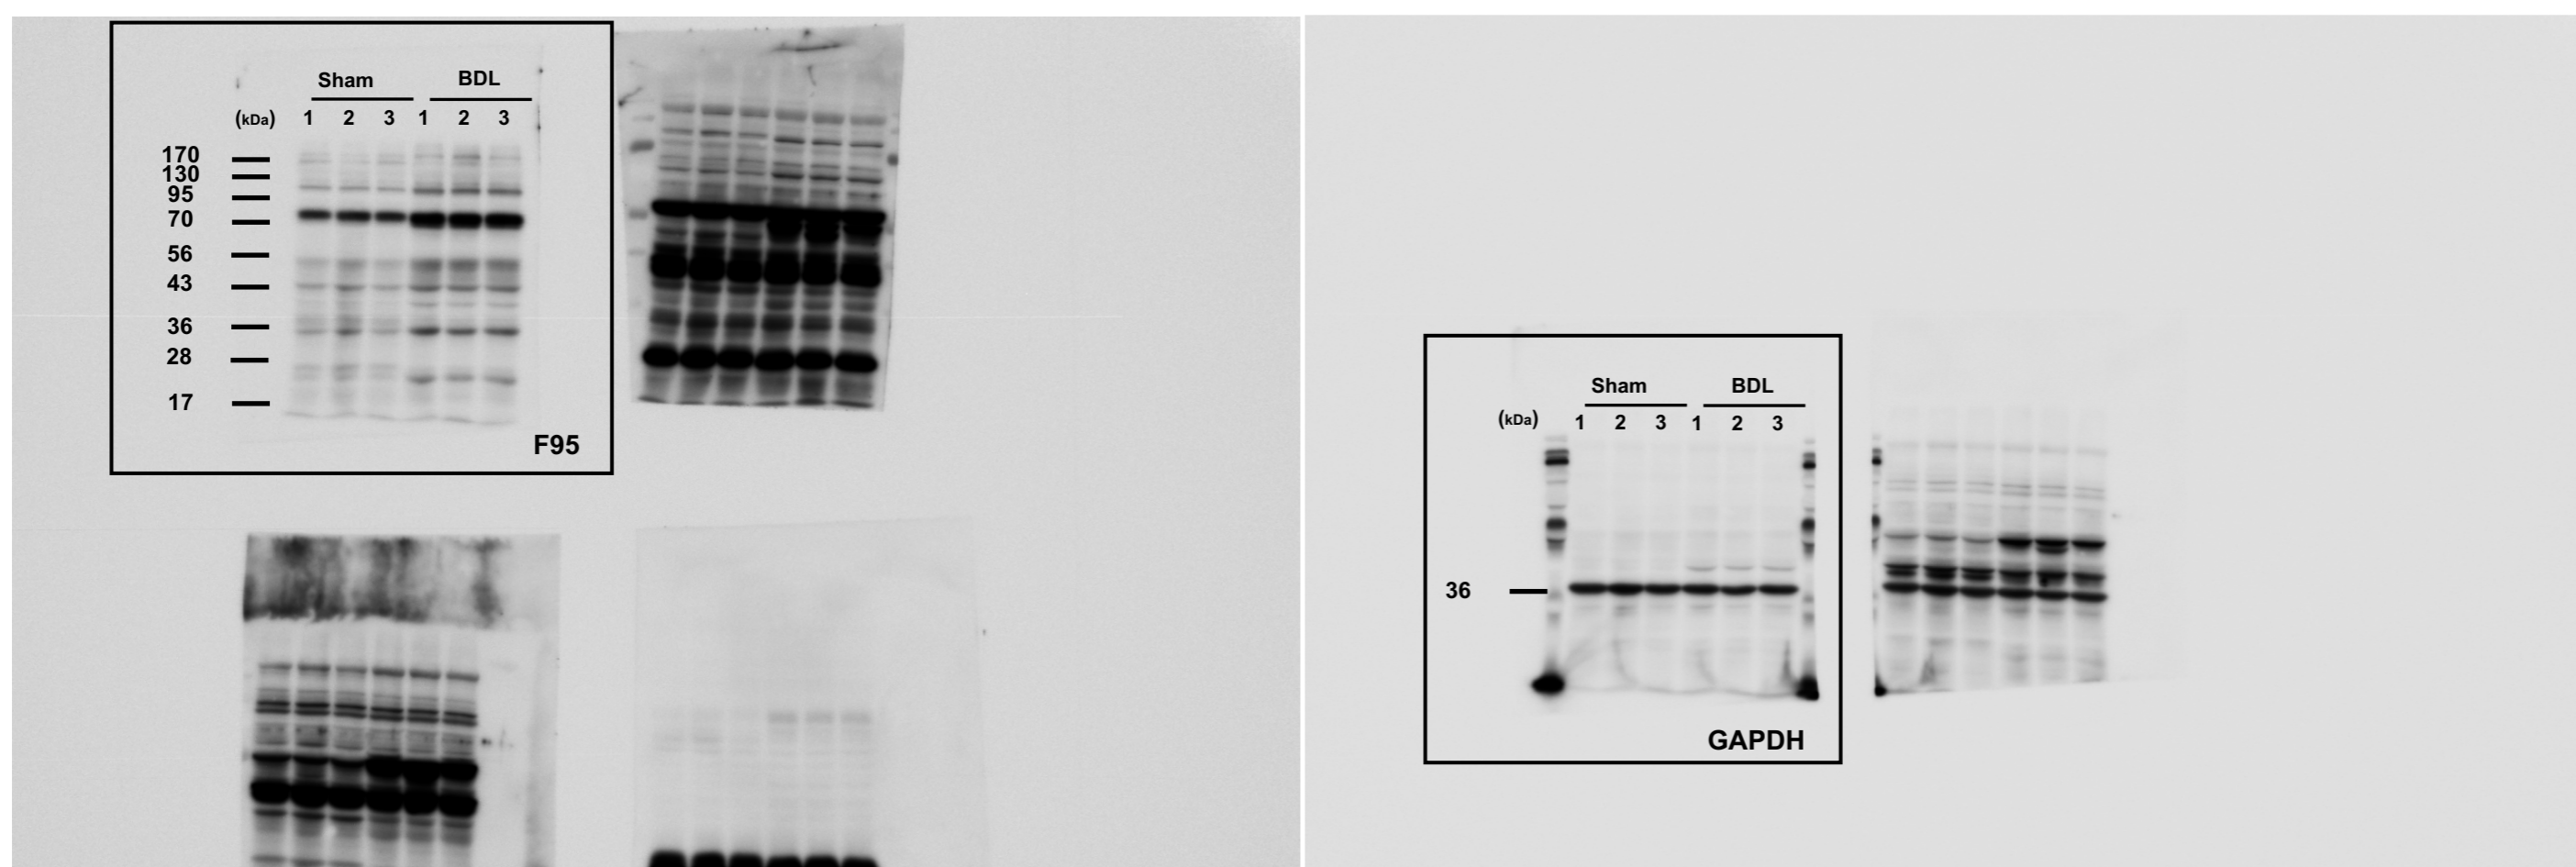

**Figure 5**

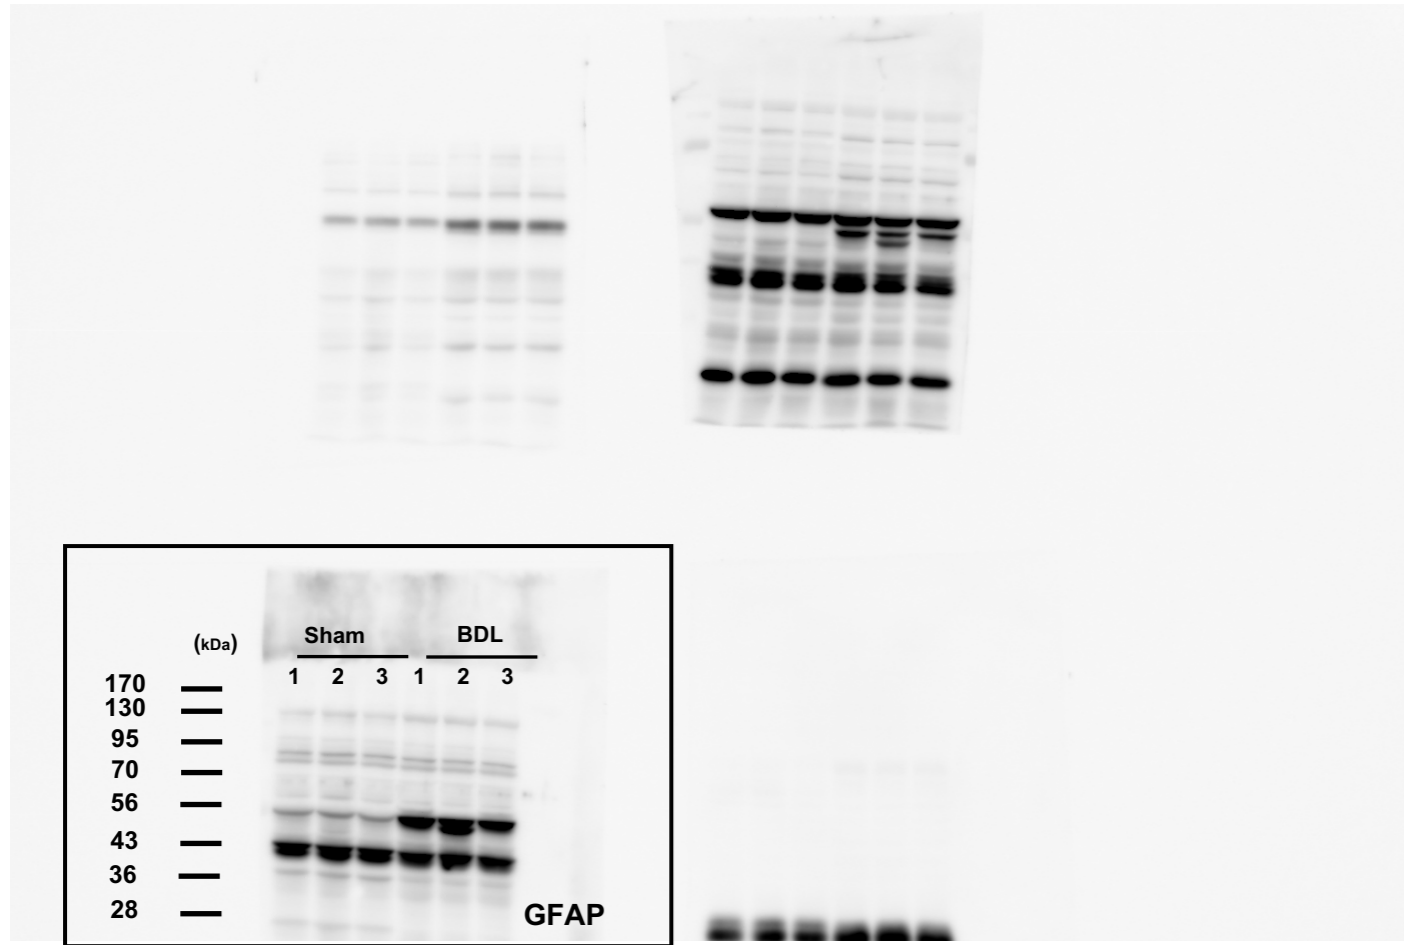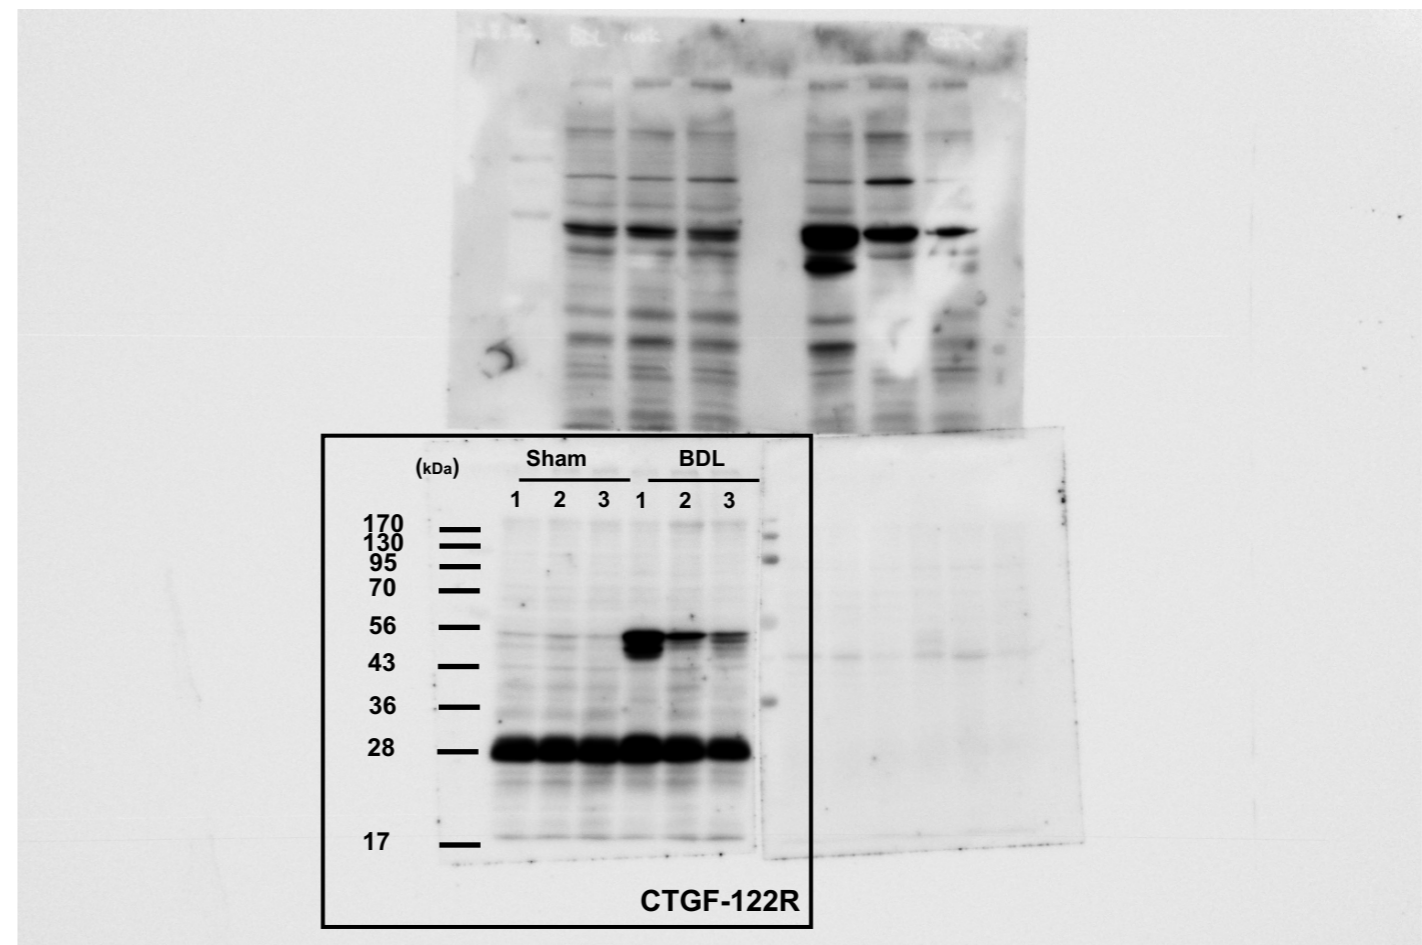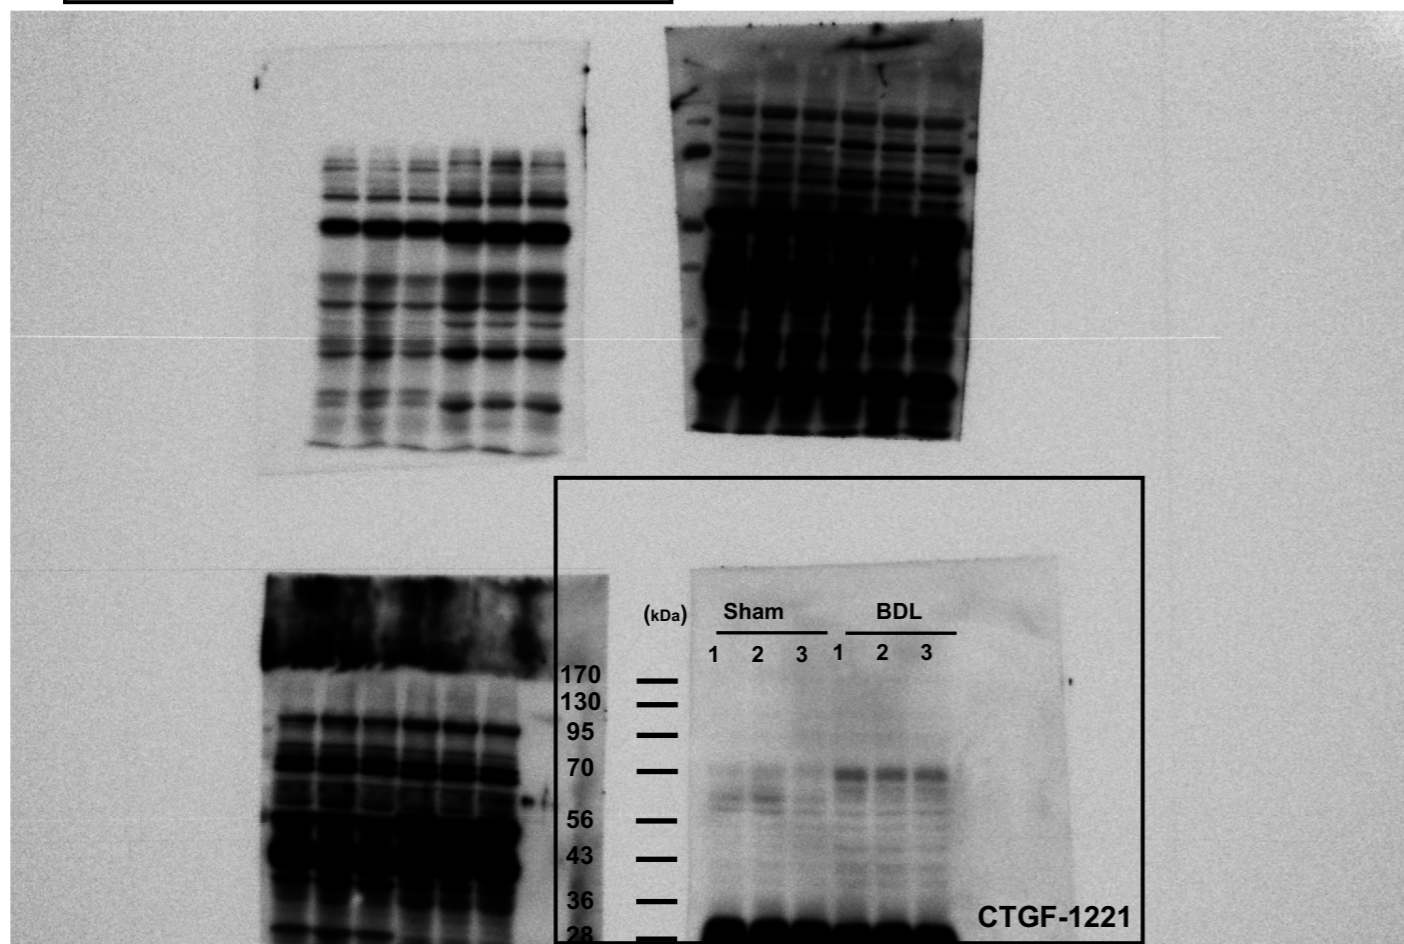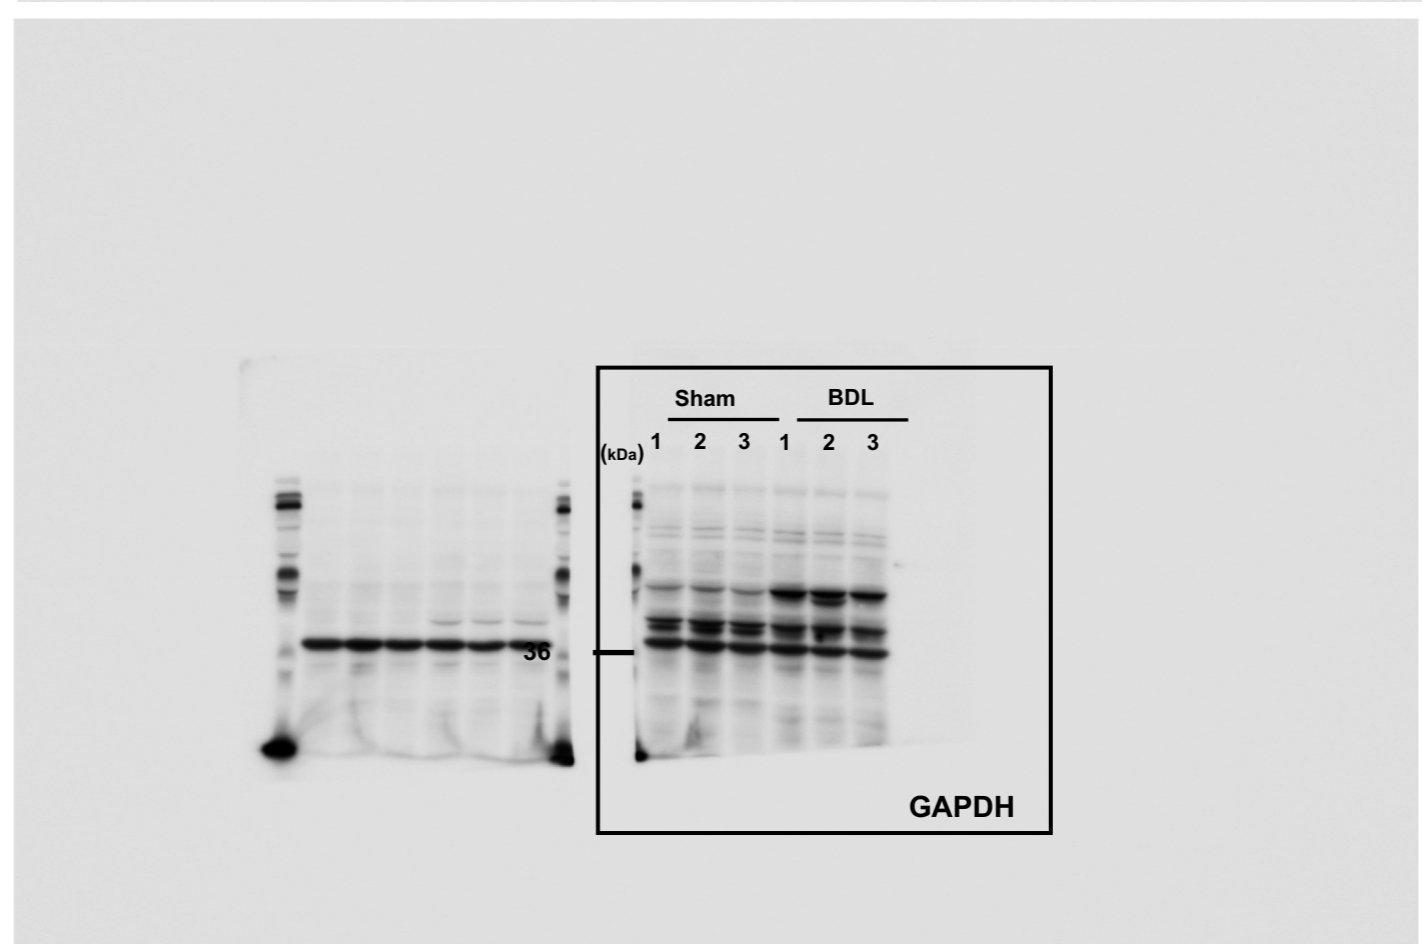

# S1 Figure

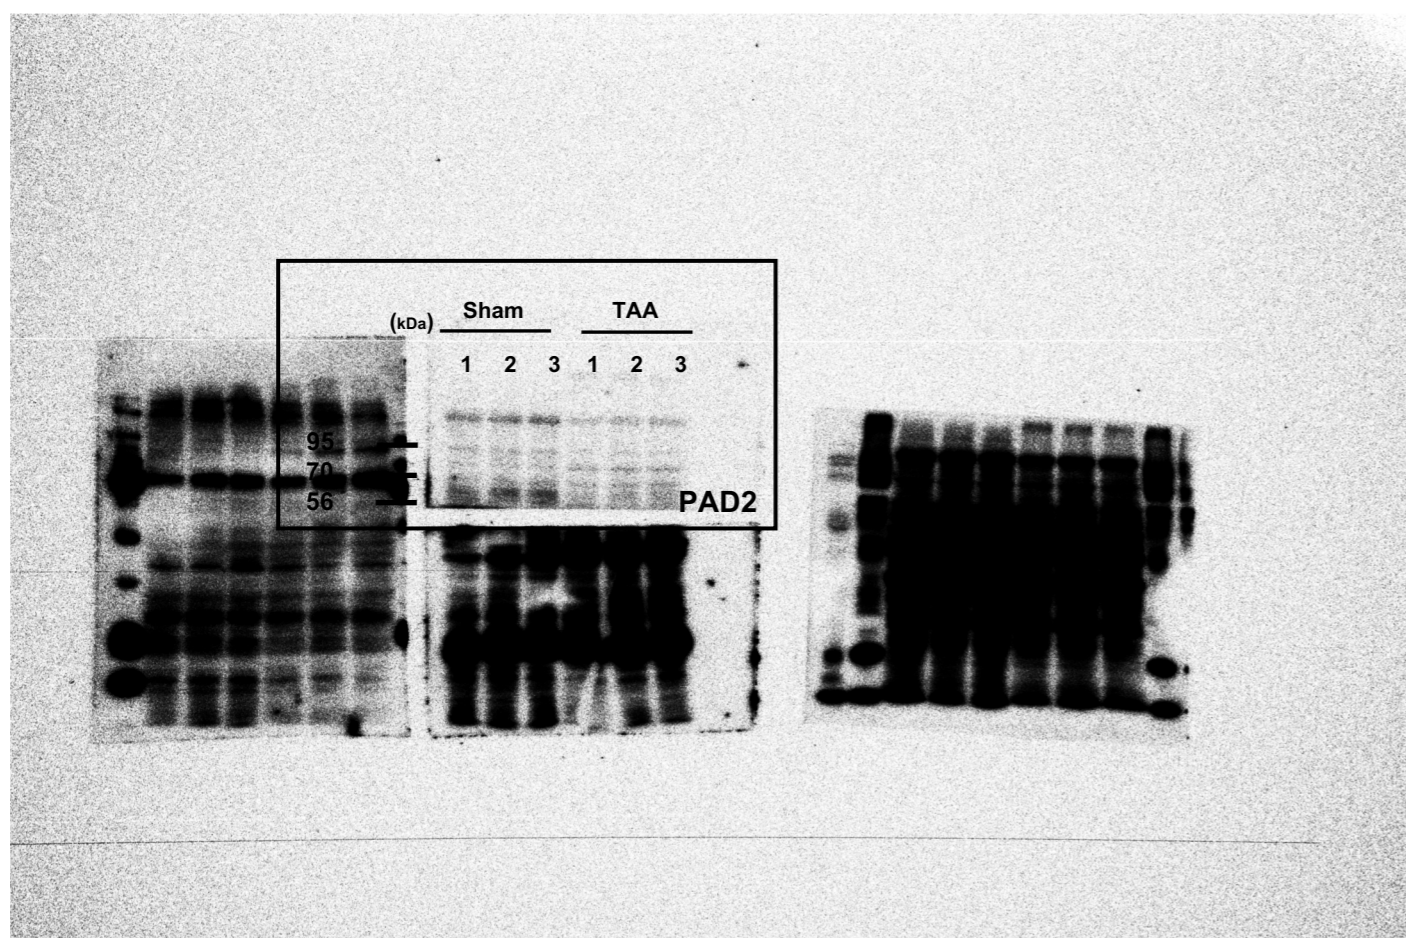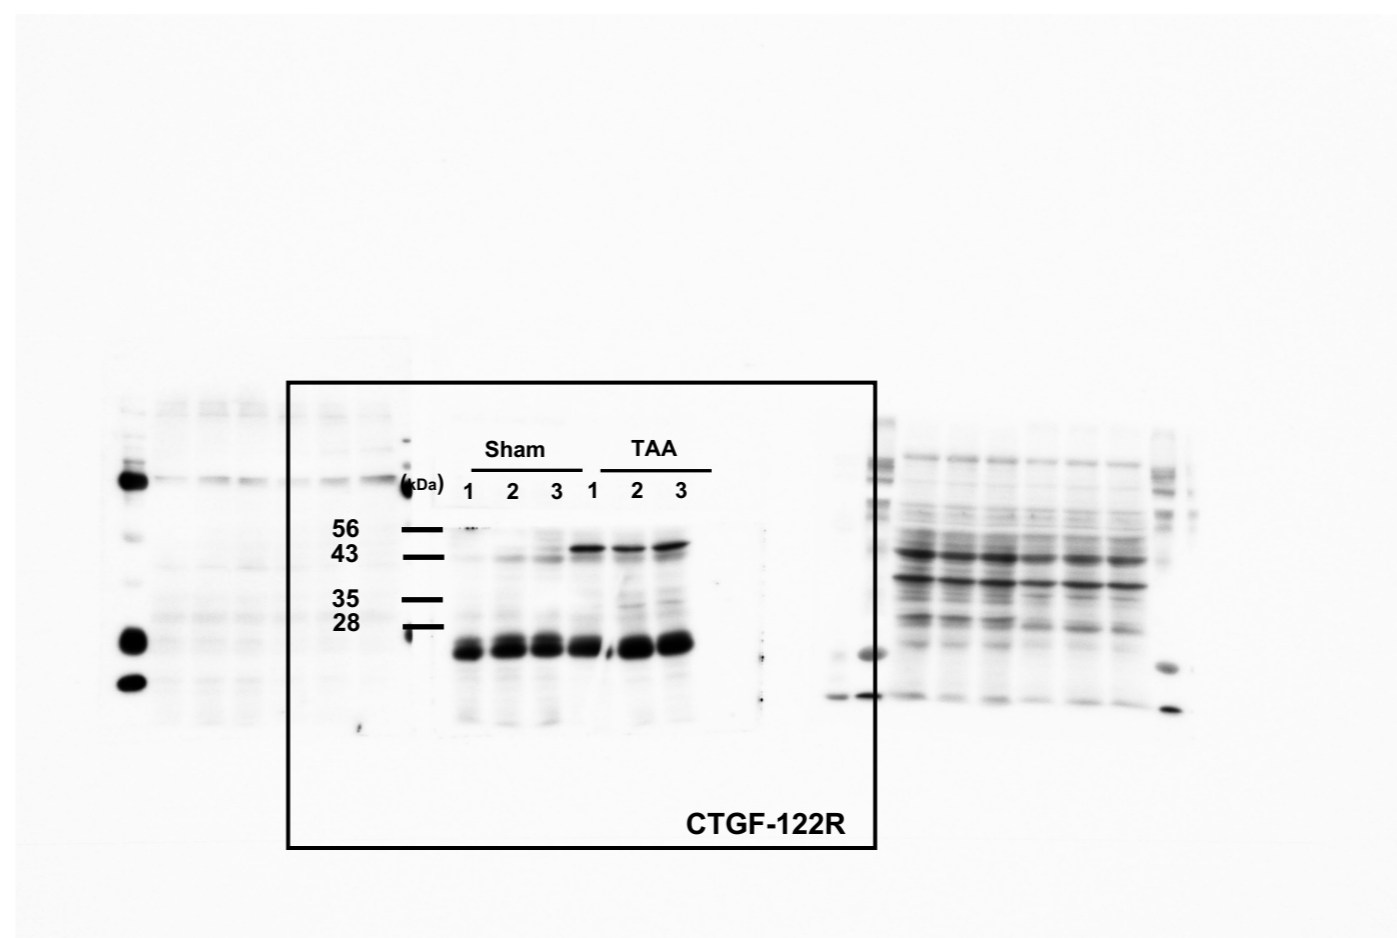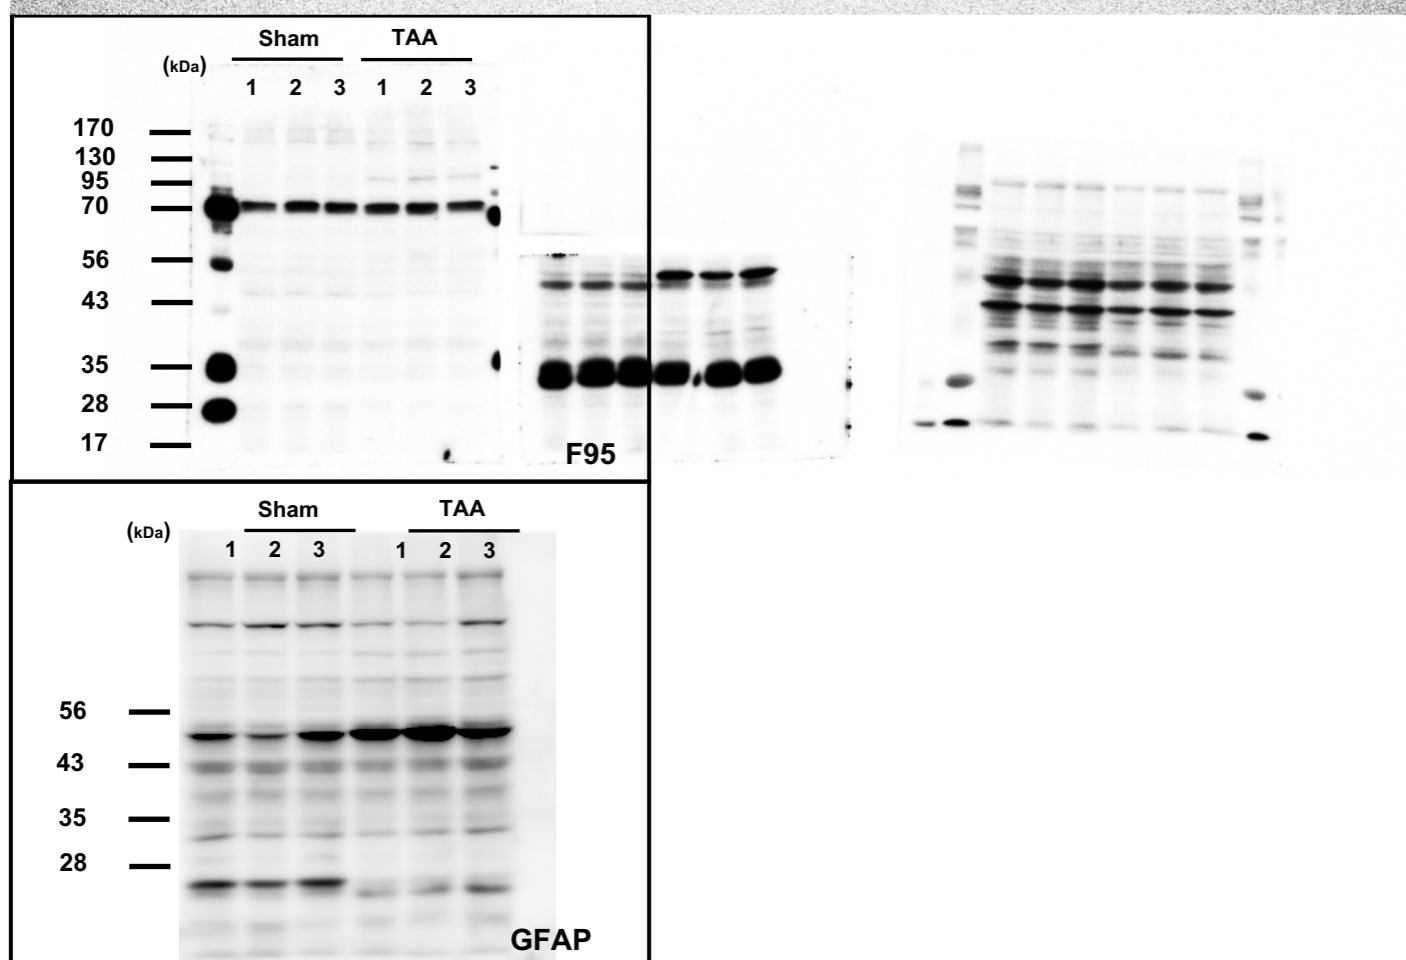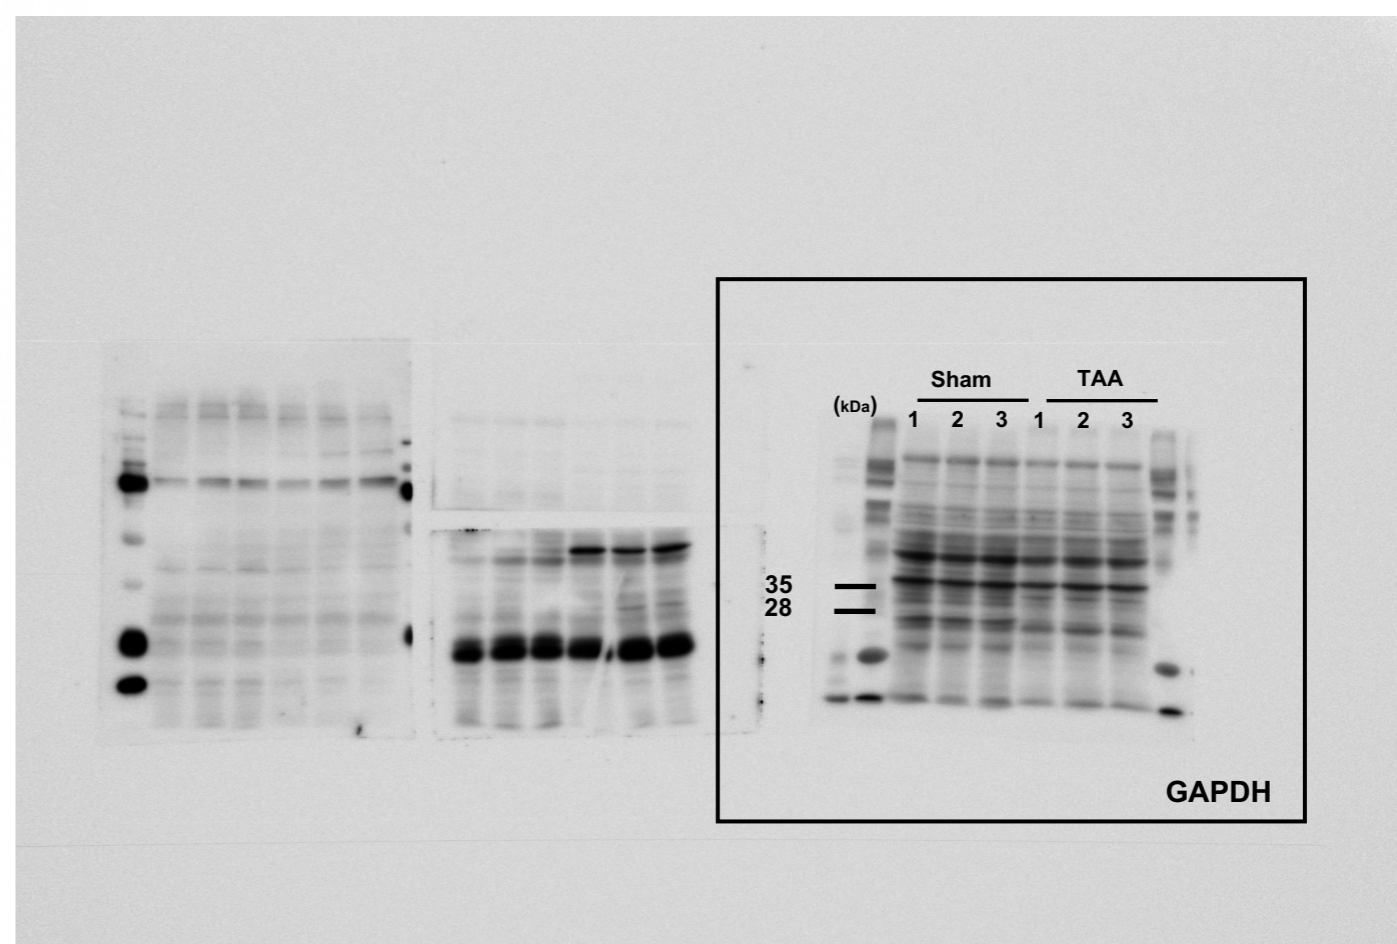

Supplement: pone.0201744.s003.pdf [file pone.0201744.s003.pdf]
